1 **The restoration species pool for restoring tropical landscapes: assessment of**  
2 **the largest Brazilian supply chain**

3

4 Cristina Yuri Vidal <sup>1, 2, \*</sup>; Rafaela Pereira Naves<sup>3</sup>, Ricardo Augusto Gorne Viani<sup>4</sup>,  
5 Ricardo Ribeiro Rodrigues<sup>2</sup>

6

7 \*Address correspondence to C.Y.Vidal, email [yurialoha@gmail.com](mailto:yurialoha@gmail.com)

8 <sup>1</sup> Universidade Estadual de Campinas, Programa de Pós-Graduação em Biologia Vegetal,  
9 Instituto de Biologia, Cidade Universitária Zeferino Vaz, 13.083-875, Campinas-SP, Brazil.

10 <sup>2</sup> Departamento de Ciências Biológicas, Universidade de São Paulo, Escola Superior de  
11 Agricultura “Luiz de Queiroz”, Av. Pádua Dias, 11, 13.418-900, Piracicaba-SP, Brazil.

12 <sup>3</sup> Departamento de Ciências Florestais, Universidade de São Paulo, Escola Superior de  
13 Agricultura “Luiz de Queiroz”, Av. Pádua Dias, 11, 13.418-900, Piracicaba-SP, Brazil.

14 <sup>4</sup> Departamento de Biotecnologia e Produção Vegetal e Animal, Universidade Federal de São  
15 Carlos, Centro de Ciências Agrárias, Rodovia Anhanguera, km 174, 13.600-091, Araras-SP,  
16 Brazil.

17

18 **Author contributions:** ‘CYV and RRR conceived and designed the research. CYV performed  
19 data compilation; CYV and RPN analyzed the data; CYV and RAGV led the writing of the  
20 manuscript; all authors contributed to the drafts and gave final approval for publication.

21

## 22 **Abstract**

23           Brazil has been committed to fulfill international restoration goals and to enforce  
24 environmental legislation that will require private landowners to undertake ecological  
25 restoration of 21 million hectares of degraded and deforested landscapes. To support a  
26 broad range of restoration practices, a consolidated supply chain able to represent  
27 regional plant diversity is essential. This study investigated the restoration species pool  
28 in native plant nurseries in São Paulo state, southeastern Brazil and evaluated their  
29 geographic distribution, similarity of their plant stocks and the proportion of species  
30 represented from regional floras. Despite the lack of technical assistance and the large  
31 presence of non-native species (126 species, average 7.5 species/nursery), we found still  
32 more impressive native species richness in plant nurseries (561 species, average 86.4  
33 species/nursery) from both the Atlantic Forest and Cerrado domains, representing 38 to  
34 44% of regional floras. There was a huge bias toward tree and shrub species (96.6%) and  
35 absence or underrepresentation of other growth forms, as well as of savanna specialists,  
36 animal-dispersed and threatened species. The great dissimilarity of species offered in  
37 the nurseries surveyed underscores the importance of regional seed collection  
38 practices. Effective assistance and capacitation are essential to address issues related to  
39 misidentification of species, underrepresentation of most functional plant groups, and  
40 the presence of non-native species, as well as to support the supply chain, currently  
41 undergoing market downturn.

42

43 **Key words:** active restoration, ecological restoration, plant nurseries, restoration policy,  
44 seedling diversity

45

46 **Implications for practice**

- 47       • Plant nurseries collecting propagules from the surrounding vegetation provide  
48       an adequate – but limited – restoration species pool, with very dissimilar plant  
49       stocks available among plant nurseries.
- 50       • Plant nurseries concentrate their production on shrub and tree species and  
51       sub-represent other growth forms and some functional groups such as animal-  
52       dispersed and threatened species.
- 53       • The diversity of the restoration species pool is the basis to support a broad  
54       range of restoration practice, being essential to boost restoration initiatives  
55       that complement and support the conservation of remaining diversity in human  
56       modified landscapes.
- 57       • Effective assistance and capacity building should be provided to address issues  
58       related to misidentification, underrepresentation of functional groups and the  
59       presence of exotic and invasive species, as well as to support the supply chain,  
60       currently under market downturn

61

## 62 INTRODUCTION

63           Recent studies argue it is unlikely that tropical countries will be able to  
64 achieve their international commitments to restore ecosystems without spontaneous  
65 and assisted regeneration (Chazdon & Uriarte 2016; Crouzeilles et al. 2017), which are  
66 less costly than restoration plantings and therefore crucial to scale-up restoration efforts  
67 (Holl & Aide 2011; Melo et al. 2013; Brancalion et al. 2016b; Latawiec et al. 2016).  
68 However, in landscapes with a long history of land conversion, deforestation and  
69 defaunation, resilience is low (Rodrigues et al. 2009; Brancalion et al. 2012a; Bello et al.  
70 2015; Crouzeilles et al. 2017) and vegetation recovery depends on active restoration  
71 through direct seeding or planting seedlings (Aerts & Honnay 2011; Holl & Aide 2011;  
72 Crouzeilles et al. 2017; Holl 2017; Meli et al. 2017). Indeed, planting trees is the most  
73 common tropical forest restoration technique, despite being expensive, time  
74 consuming, and labor-intensive (Rodrigues et al. 2011; Palma & Laurance 2015;  
75 Brancalion et al. 2016b; Holl et al. 2017; Meli et al. 2017; Jalonen et al. 2018).

76           Restoration of tropical forests within severely deforested scenarios is a  
77 major challenge because seed hand-collection and seedling production is a bottleneck,  
78 particularly when intending to represent a large pool of native species and genotypes  
79 (Brancalion et al. 2012a; Nevill et al. 2016; Jalonen et al. 2018). There are 40 to 53  
80 thousand tree species within the tropics (Slik et al. 2015) and at least 30 thousand seed  
81 plant species in Brazil (Forzza et al. 2012; BFG 2015); as expected, there is not enough  
82 knowledge on their biology and current distribution. The challenge goes further when  
83 considering the process of harvesting propagules for viable seeds and seedlings'  
84 production, restrained by the reduced and degraded forest cover, lack of information

85 on species reproductive biology and phenological patterns, unskilled labor and deficient  
86 technical capacity and assistance (Gregorio et al. 2004; Viani & Rodrigues 2009;  
87 Brancalion et al 2012a; Palma & Laurance 2015; Dedefo et al. 2017; Jalonen et al. 2018;  
88 White et al. 2018). Despite these setbacks, representation of regional plant diversity is  
89 essential to consolidate a native plant market offering an adequate restoration species  
90 pool (i.e. native species available in plant nurseries for restoration purposes) (Ladoucer  
91 et al. 2017), enabling a broad range of restoration goals (Brancalion et al. 2012b).

92           Brazil has set a role model regarding restoration initiatives (Aronson et al.  
93 2011; Calmon et al. 2011; Brancalion et al. 2013; Melo et al. 2013; Chaves et al. 2015;  
94 Holl 2017; Viani et al. 2017). The country has been committed to fulfill international  
95 restoration goals and to enforce a recently revised environmental legislation (i.e., Native  
96 Vegetation Protection Law no. 12.651/2012, hereafter NVPL) that applies on private  
97 lands, and defines the proportion of native vegetation that must be maintained under  
98 protection or restricted use (Brancalion et al. 2016a). To comply with NVPL in case of  
99 vegetation deficit, landowners are required to restore vegetation using native species  
100 under an ecological restoration perspective (SER 2004). In a few specific cases,  
101 landowners are allowed to combine native and non-native species and generate income  
102 from the exploitation of their economic potential for timber and non-timber products  
103 (Brancalion et al 2012b and 2016a; Amazonas et al. 2018; Cerullo & Edwards 2018).  
104 Estimates on NVPL's restoration demand reaches 21 million hectares (Soares-Filho et al.  
105 2014). Considering that landowners do not collect and produce their own seedlings for  
106 active restoration, building up capacity and a supply chain to meet this demand is a  
107 major challenge, common to many other tropical countries worldwide.

108                   In fact, most examples of established supply chain for native species aiming  
109 large-scale restoration are for non-tropical ecosystems (Ladouceur et al. 2017; Jalonen  
110 et al. 2018; White et al. 2018). As an exceptional example, São Paulo state, Brazil  
111 developed a supply chain to fulfill their ecological restoration goals, with notable  
112 advances on the establishment of plant nurseries during the last 30 years (Barbosa et al.  
113 2003; Martins 2011; Silva et al. 2015, 2017), following the implementation of a legal  
114 framework for ecological restoration (Durigan et al. 2010; Aronson et al. 2011; Chaves  
115 et al. 2015). Besides, São Paulo state represents an unique opportunity for a case study  
116 because i) it is composed by two of the hottest global hotspots, Atlantic Forest and  
117 Cerrado (Myers et al. 2000; Forzza et al. 2012) and ii) about 75% of the state has  
118 vegetation cover below the 30% threshold (Pardini et al. 2010; Estavillo et al. 2013;  
119 Banks-Leite et al. 2014), reinforcing the demand on active restoration. Even though  
120 previous assessments and reports investigated plant nurseries' structure, production  
121 capacity and related difficulties (Barbosa & Martins 2003; Martins 2011; Silva et al. 2015,  
122 2017), little or none attention has focused on the composition of the restoration species  
123 pool and its ecological aspects regarding taxonomic and functional approaches.

124                   This study evaluated the restoration species pool available in native plant  
125 nurseries in São Paulo State, Brazil. We investigated their production capacity regarding  
126 number of seedlings, with information about richness and abundances distributions  
127 among available species. We also examined the geographical distribution of native plant  
128 nurseries along the state, the compositional similarity of their plant stocks and the  
129 representation of restoration species pool compared to regional floras. Finally, we  
130 explored the relation of diversity descriptors with possible explanatory variables such as  
131 production capacity, surrounding forest cover and number of vegetation types. We

132 predicted native species composition is similar among plant nurseries and that they have  
133 an average richness around 80 species, in accordance to state recommendations  
134 established since 2008 (see details in Aronson et al. 2011; Chaves et al. 2015). We also  
135 predicted a compatible but limited representation of regional floras – both under  
136 taxonomic and functional approaches - and a positive influence of production capacity,  
137 surrounding forest cover and number of vegetation types on overall nurseries' diversity.

138

## 139 **METHODS**

### 140 **Data surveys and sampling**

141 We compiled all São Paulo state plant nurseries listed on previous official  
142 assessments (Barbosa & Martins 2003; Martins 2011; Silva et al. 2015) plus new or  
143 unlisted nurseries indicated by restoration practitioners, totaling 347 plant nurseries.  
144 While contacting them by email/website, telephone or in person, we discharged  
145 duplicates (n=18), those we could not reach by any means after five attempts (n=55), or  
146 that do not produce native species (n=33). Considering 241 eligible plant nurseries, we  
147 divided our sample in: i) quick surveys to assess their current production (2015 to 2017);  
148 ii) detailed surveys to assess relevant information on the origin of propagules, infra-  
149 structure, and market related issues (questionnaire adapted from Oliveira & Zakia 2010),  
150 as well as their species and abundance production (raining season 2015/2016)  
151 (Appendix S1, Supporting Information).

152 For the quick surveys, we considered all regions of the São Paulo state, while  
153 for detailed surveys we sampled regions with mean forest cover below 30% (i.e.  
154 Southwest, Northwest, Center, Southeast) (Fig. 1), where active restoration is usually

155 recommended (Holl & Aide 2011; Tambosi et al. 2013). Additionally, detailed surveys'  
156 sampling depended on plant nurseries' willingness to provide the requested  
157 information.

158 Data on species abundance included nursery-grown seedlings available for  
159 planting in the field, regardless of the plant container or size. We disregarded hand-  
160 collected seeds because plant nurseries usually do not sell them for restoration  
161 purposes, but rather use them to produce seedlings. We emphasized the list of available  
162 species should consider only those appropriate for ecological restoration projects (i.e.  
163 excluding urban afforestation, silviculture, etc.), giving the nursery's staff free will to  
164 choose native species based on their judgment - a common real life practice that can  
165 mistakenly lead to the misuse of non-native species.

166 We dismissed morphospecies identified only to the family or genus levels  
167 and standardized species names using the Plantminer tool ([www.plantminer.com](http://www.plantminer.com),  
168 Carvalho et al. 2010), according to Flora do Brasil 2020 (<http://reflora.jbrj.gov.br/>) and  
169 The Plant List ([www.theplantlist.org](http://www.theplantlist.org)). From Flora do Brasil 2020 we retrieved  
170 information on growth forms, occurrence (Atlantic Forest and/or Cerrado) and origin  
171 (native, non-native), with further evaluation of problematic non-native species  
172 according to Sartorelli et al. (2018). For species occurring in the Cerrado (Brazilian  
173 Savanna), we refined the classification of occurrence according to their habitat  
174 preferences: i) savanna specialist, ii) forest specialist and iii) generalists (Mendonça et  
175 al. 2008; Abreu et al. 2017). For a functional grouping approach, we classified native  
176 species into the following functional guilds: i) pioneer, ii) fast-growing shading  
177 (Rodrigues et al. 2009), iii) understory non-pioneer and iv) canopy non-pioneer.



178 Additionally, species were classified by dispersal syndromes and sub-syndromes (Bello  
179 et al. 2017).

180 For each plant nursery, we calculated the percentage of forest cover and the  
181 number of vegetation types (ordinal) in a surrounding 100 km buffer, extracting the  
182 information available on official shapefiles provided by the São Paulo State Forest  
183 Inventory (2011) with ArcGIS software (University of Campinas license). The six  
184 vegetation types occur both within Atlantic Forests (Seasonal Semideciduous Forests  
185 (SSF), Atlantic Forest *sensu stricto* (AFSS), Mixed Temperate Araucaria Forests (MTAF),  
186 Alluvial and Swamp Forests (A/SF)) and within Cerrado (Cerrado *sensu stricto* and  
187 Cerradão).

188

## 189 **Data analysis**

190 We compared native species and families available on plant nurseries with  
191 two references. The first reference is the list of species officially recommended for  
192 restoration in different regions of São Paulo State, provided by the state's Botanical  
193 Institute (hereafter SP-IBt) and available at [www.botanica.sp.gov](http://www.botanica.sp.gov). The second reference  
194 is a dataset of floristic surveys performed by the Forest Ecology and Restoration  
195 Laboratory (LERF/University of São Paulo), describing the occurrence of shrub/tree  
196 species across forest fragments (N=371) in the studied regions (Rodrigues et al. 2011).  
197 Comparisons focused on evaluation of shared and exclusive species, proportions of  
198 functional guilds and ranking the botanical families' richness, in order to detect eventual  
199 mismatches or lacking groups in plant nurseries.

200 To describe the diversity among plant nurseries and within ecological regions we  
201 used species abundance distribution models (SAD) (McGill et al. 2007). SAD models  
202 provide a powerful way to understand the abundance structure of nurseries'  
203 production, revealing the evenness (Magurran 2013) of their plant stocks. We fitted log  
204 series and Poisson log normal distributions to the species abundance data using the  
205 maximum-likelihood tools with the sads package for R 3.1 version (Prado et al. 2016).  
206 We compared the models based on Akaike's information criterion (AIC) (Hilborn &  
207 Mangel 1997) and for every plant nursery, Poisson log normal provided the best fit to  
208 our data. Therefore, we used its parameter sigma ( $\sigma$ ) as a local diversity metric (Sæther  
209 et al. 2013).

210 We fitted linear models to analyze the influence of explanatory variables -  
211 production capacity, forest cover, number of vegetation types, ecological regions - on  
212 richness and sigma diversity descriptors. We tested all models to meet assumptions of  
213 normality and homogeneity of variance and then compared them based on AIC. We  
214 ranked the models according to the lowest AIC value; models with a difference in AIC  
215 ( $\Delta$ )  $\leq 2$  can be considered to have equivalently strong empirical support and similar  
216 plausibility (Hilborn & Mangel 1997; Bolker 2008).

217 To evaluate spatial variation of plant stocks' diversity among studied  
218 nurseries, we calculated a multi-site Sorensen dissimilarity index ( $\beta_{SOR}$ ) as a measure of  
219 total  $\beta$  diversity for each region of the state. Then, we calculated the contribution of the  
220 turnover and nestedness components of total  $\beta$  diversity, where turnover indicates the  
221 dissimilarity resulting from species replacement among plant stocks, whereas  
222 nestedness indicates the dissimilarity resulting from differences on species richness

223 (Baselga 2010; Socolar et al. 2016). For practical purposes, high turnover means that  
224 plant nurseries have very dissimilar plant stocks in terms of species composition,  
225 indicating that regional restoration species pool result from their plant stocks combined.  
226 On the other hand, highly nested  $\beta$  diversity means that species-poor plant nurseries  
227 have species that are included in the species-rich plant nurseries. For total  $\beta$  diversity  
228 ( $\beta_{\text{SOR}}$ ) decomposition, we calculated the Simpson index ( $\beta_{\text{SIM}}$ ) that only measures  
229 turnover and the nestedness ( $\beta_{\text{NEST}}$ ) component as the difference of  $\beta_{\text{SOR}} - \beta_{\text{SIM}}$  (Baselga  
230 2010). We performed total  $\beta$  diversity ( $\beta_{\text{SOR}}$ ) decomposition using the function “beta-  
231 multi.R” in the R package “betapart” (Baselga & Orme 2012).

232

## 233 **RESULTS**

### 234 **Plant nurseries assessment**

235 We contacted 241 registered native plant nurseries with a “quick” survey,  
236 and confirmed that 64.3% (n=155) were still active, while 35.7% were either currently  
237 deactivated (n=69) or retailing seedlings from other nurseries (n=17). Geographic  
238 distribution of active nurseries was concentrated in the Center (n=55) and Southeast  
239 (n=57) regions of São Paulo state (Fig. 1); combined they constituted 72.3% of all plant  
240 nurseries.

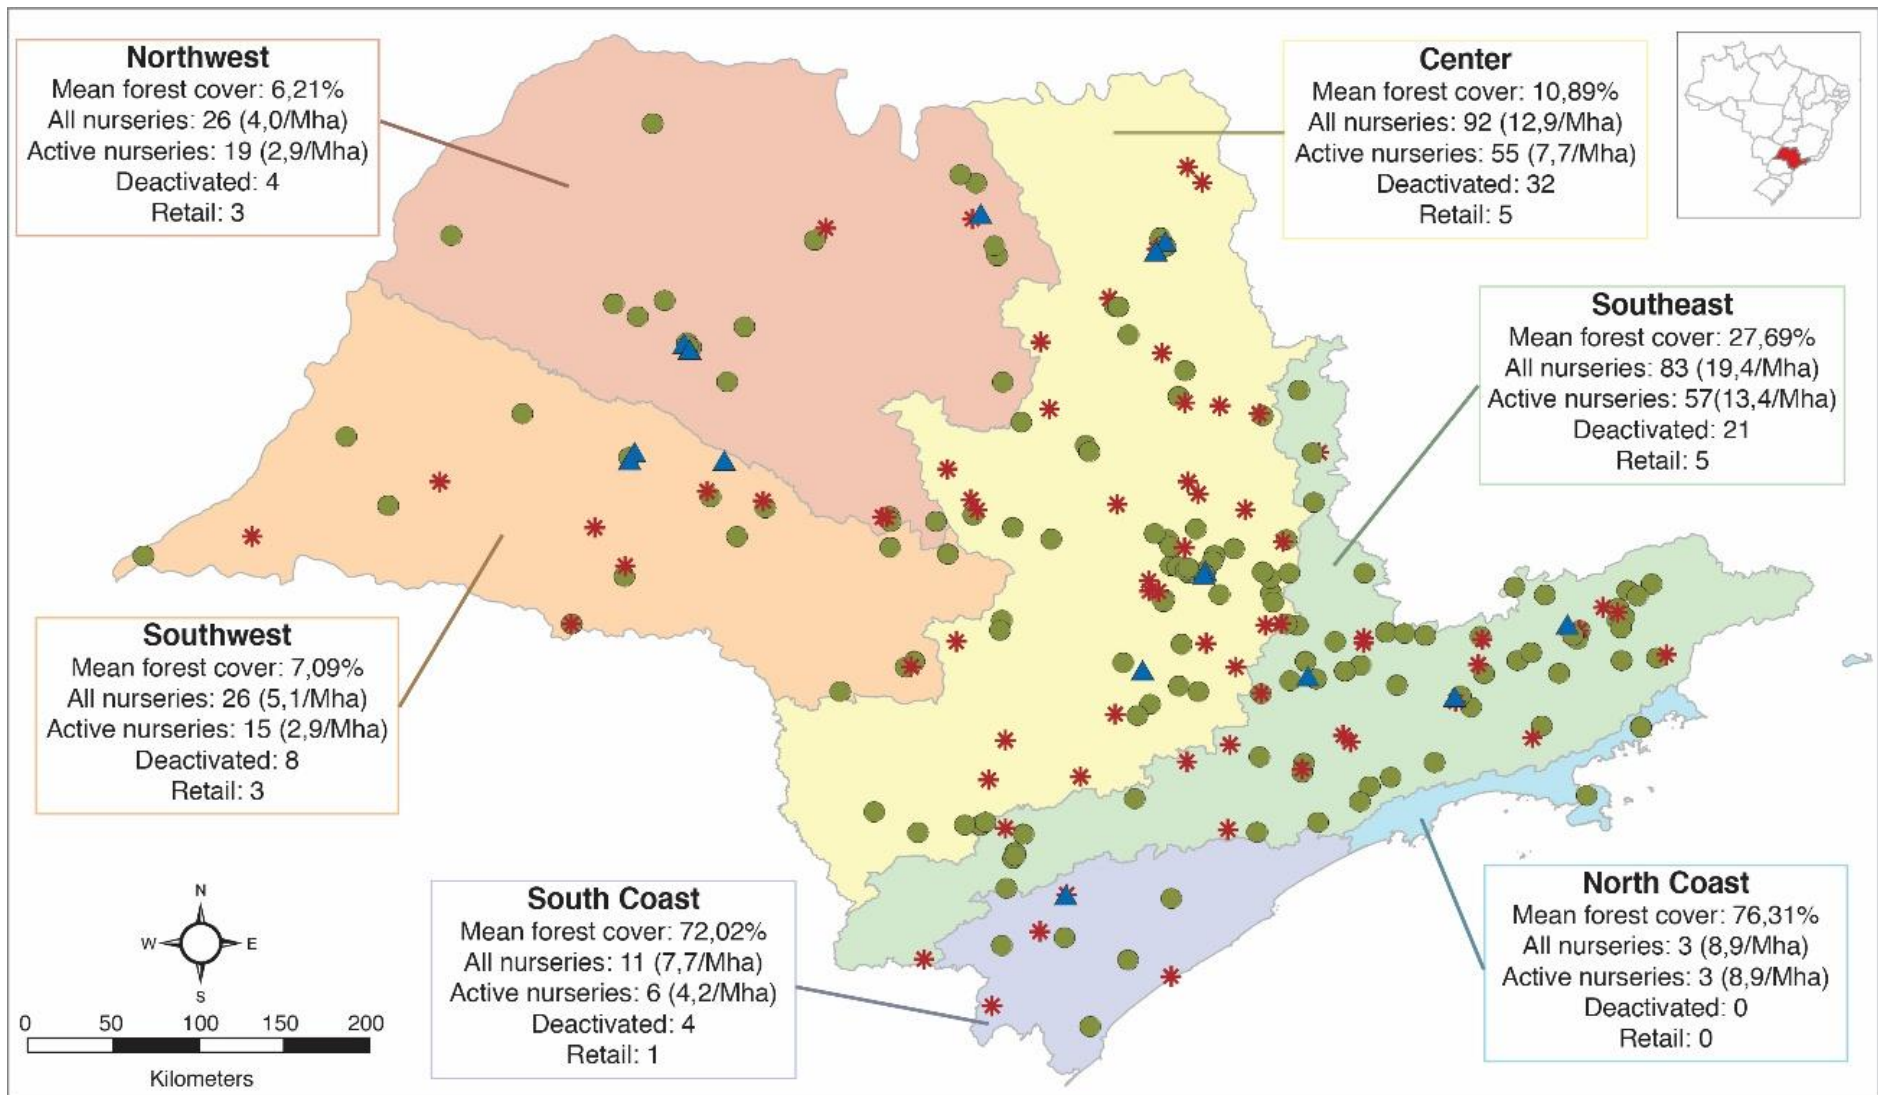

1

2 **Figure 1.** Distribution of native plant nurseries among the ecological regions defined by São Paulo state’s Botanical Institute (SP-IBt). Each region is described  
 3 by their mean forest cover and by the quantity and density of all assessed native plant nurseries and active nurseries only, as well as the quantity of deactivated  
 4 and retailing nurseries. Mean forest cover based on São Paulo State Forest Inventory (2011) and density calculated by million hectares (Mha).

1                   From detailed surveys made with 54 plant nurseries, we noted that 87%  
2 (n=47) collected their own propagules (i.e., seeds and/or fruits), harvesting from the  
3 surrounding forest fragments within an average distance of 100 km radius. Over half of  
4 them (57%, n=31) also purchased additional seeds from other sources - even from out  
5 of the state - to enhance diversity. In the rainy season of 2015/2016 the nurseries we  
6 surveyed produced approximately 9.3 million seedlings, with individual production  
7 ranging from 3,500 to 1,800,000 seedlings. Regarding identification practices, most  
8 active nurseries (90%) kept track of species using both popular and scientific names.  
9 However, for botanical identification they relied on their own expertise and/or  
10 illustrated guides such as "*Brazilian Trees*" (Lorenzi 2002), as most of them lack access  
11 to qualified botanical experts.

12

### 13 **Species diversity**

14                   From 687 plant species identified in the nursery survey, 561 (81.1%) were  
15 native to São Paulo and 126 (17.8%) were non-native (Tables S1 & S2, Supporting  
16 Information). Among natives, there were 542 shrub/tree species (96.6%), five sub-  
17 shrubs, seven palm trees and seven lianas, with average richness of 86.4 per nursery,  
18 ranging from 18 to 194 species (Table 1). The 126 non-native species represented 4.8%  
19 of the total number of seedlings, with particular concern over 10 non-native species that  
20 should be avoided in restoration projects due to their invasive potential (Sartorelli et al.  
21 2018) (Table S2, Supporting Information).

22

23 **Table 1.** Native and non-native species richness registered for different regions of the  
 24 of São Paulo state, where we sampled N plant nurseries. Threatened species included  
 25 extinct, extinct in the wild, critically endangered, endangered or vulnerable species  
 26 according to IUCN or the State of Sao Paulo's red list. Regions: SE= southeast,  
 27 CT=center, NW=northwest, SW=southwest.

| Regions | N  | Native species |     |      |     |                    | Non- native species |     |      |     |
|---------|----|----------------|-----|------|-----|--------------------|---------------------|-----|------|-----|
|         |    | all nurseries  | min | mean | max | threatened species | all nurseries       | min | mean | max |
| SE      | 17 | 326            | 18  | 74.4 | 124 | 12                 | 44                  | 1   | 5.4  | 18  |
| CT      | 27 | 472            | 29  | 92.5 | 194 | 16                 | 87                  | 1   | 8.3  | 22  |
| NW      | 6  | 227            | 27  | 87.4 | 116 | 7                  | 40                  | 2   | 10.2 | 27  |
| SW      | 4  | 193            | 54  | 95   | 122 | 7                  | 21                  | 4   | 7.5  | 11  |
| Total   | 54 | 561            | 18  | 86.4 | 194 | 19                 | 126                 | 1   | 7.5  | 27  |

28

29           Considering only native shrub/tree species, plant nurseries' production  
 30 encompassed 419 species (37.9%) recommended for restoration by the São Paulo state  
 31 and 399 species (44.2%) registered within surveys in São Paulo forest remnants, as well  
 32 as 86 native species that unmatched these floristic lists (Fig. 2A). From all native species  
 33 available in the plant nurseries, 462 occur in the Atlantic Forest biome and 396 species  
 34 in the Cerrado, but for the latter, only 94 were savanna specialist species (23.7%), while  
 35 250 were forest specialists or generalists (63.1%).

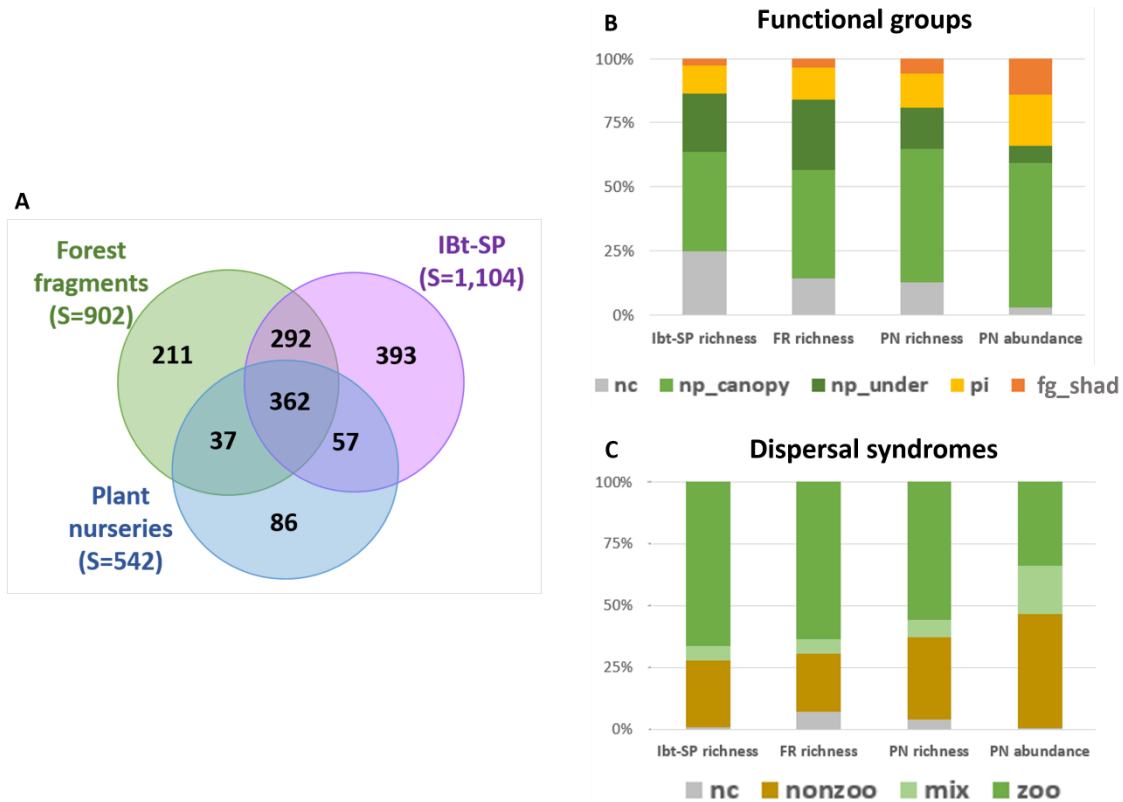

36

37 **Figure 2.** Comparison of floristic composition among plant nurseries (PN), forest  
 38 fragments (FR) and IBt-SP. (A) Shared and exclusive species richness; (B) Proportion of  
 39 functional groups/guilds: nc = non-classified, np\_canopy = canopy non-pioneer,  
 40 np\_under = understory non-pioneer pi = pioneer and fg\_shad = fast-growing shading  
 41 species; (c) Proportion of dispersal syndromes: nc= non-classified, nonzoo = non  
 42 zoochoric, mix= mixed (both non-zoo and zoo), zoo = zoochoric species.

43

44 Plant nurseries and their plant stocks partially represented species richness and  
 45 overall proportions of functional groups and dispersal syndromes observed on  
 46 references (Figs. 2B, 2C). When considering plant stocks' species abundances, non-  
 47 pioneer (canopy and understory) were approximately two times more abundant than  
 48 pioneer and fast-growing shading species (Fig. 2B), while animal-dispersed species  
 49 represented over a half (56%) of species and one third (34%) of produced seedlings  
 50 (Figure 3C). Comparison of the richest plant families registered on references with those  
 51 available on plant nurseries indicated that despite a fair representation of many families,  
 52 some of them were under-represented – for instance, Lauraceae, Melastomataceae and

53 Rubiaceae families had, on average, less than 30% of their species available on plant  
54 nurseries (Figure S1, Supporting Information).

55 Species abundance distribution patterns revealed that nurseries present  
56 uneven plant stocks, with 35 species (6.2%) representing half of all seedlings, while the  
57 other half included 526 species (93.7%) Regarding species' frequency among plant  
58 nurseries, we classified only 12 species (2%) as common (i.e., occurring in more than  
59 75% nurseries), and 440 species (78.6%) as rare (i.e., occurring in less than 25%  
60 nurseries). The 35 most abundant species – 12 of which are also among the most  
61 frequent – represent half of seedlings available. They were mostly non-pioneer canopy  
62 (23 species), with five fast-growing shading and five pioneer species, and predominantly  
63 abiotic-dispersed species (19), with 10 dispersed either by abiotic or biotic factors; only  
64 six species are strictly dependent on animals.

65 In agreement with the above-cited prevalence of rare species, the multi-site  
66 Sorensen dissimilarity index ( $\beta_{SOR}$ ) presented high values in all regions of the state, with  
67 a consistent major contribution from its turnover component, revealed by the higher  
68 values of  $\beta_{SIM}$  (Table 2).

69 **Table 2.** Total beta diversity ( $\beta_{SOR}$ ) decomposed into turnover ( $\beta_{SIM}$ ) and nestedness  
70 ( $\beta_{NEST}$ ) components for all distinct regions. N is the number of sampled plant nurseries.

| Regions   | N  | $\beta_{SOR}$ | $\beta_{SIM}$ | $\beta_{NEST}$ |
|-----------|----|---------------|---------------|----------------|
| Southeast | 17 | 0.87 (100%)   | 0.78 (89.6%)  | 0.09 (10.4%)   |
| Center    | 27 | 0.90 (100%)   | 0.83 (92.2%)  | 0.07 (7.8%)    |
| Northwest | 6  | 0.70 (100%)   | 0.58 (82.8%)  | 0.12 (17.2%)   |
| Soutwest  | 4  | 0.58 (100%)   | 0.45 (77.5%)  | 0.13 (22.5%)   |
| Total     | 54 | 0.95 (100%)   | 0.91 (95.8%)  | 0.04 (4.2%)    |

71

72

73



74            There was a positive correlation between the production capacity of a plant  
75 nursery and its species richness and sigma diversity (Fig. 3). Models considering forest  
76 cover, number of vegetation types, ecological regions were no better than expected by  
77 chance (null model) (Table S3, Supporting Information).

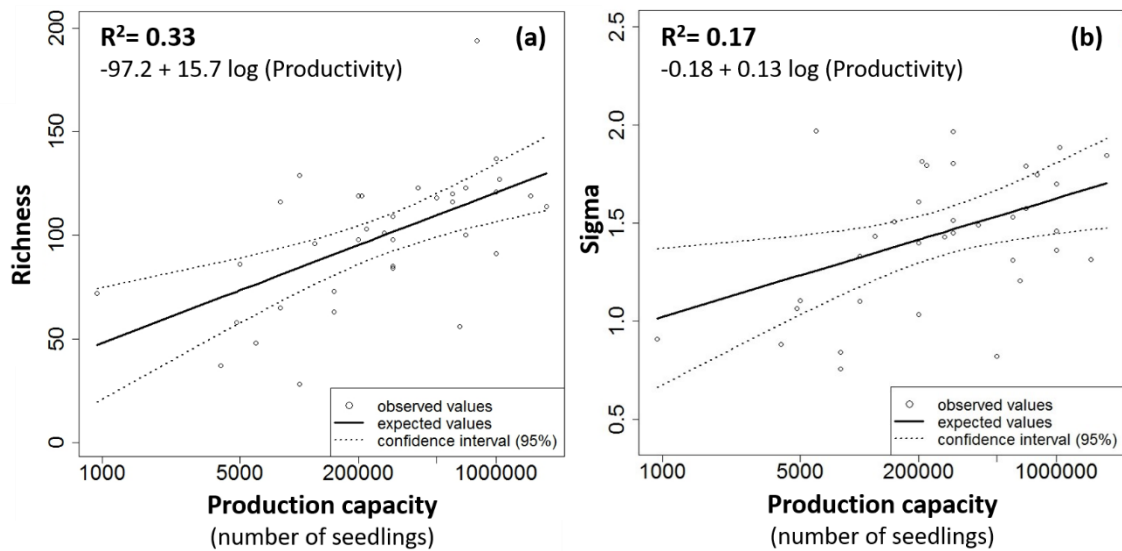

78  
79 **Figure 3.** Best fitting linear models for diversity descriptors considering production  
80 capacity as an explanatory variable for (a) richness ( $R^2 = 0.33$ ) and (b) sigma ( $R^2 = 0.34$ ).

81

## 82 DISCUSSION

83            Our study on the largest native supply chain in Brazil (Silva et al. 2017) revealed  
84 that the restoration species pool offered approximately 38% of native tree and shrub  
85 species recommended for restoration in São Paulo state. We registered high overall  
86 native species richness (561) and high average species richness per nursery (86.4), which  
87 is above Brazilian national standards (63) (Silva et al. 2015) and above previous  
88 estimates for plant nurseries in the state (Barbosa et al. 2003; Martins 2011). Another  
89 remarkable result of our study is the singularity of plant nurseries' production, proven  
90 by the high values of  $\beta$ -diversity due to its turnover component (i.e., high dissimilarity  
91 among nurseries' plant stocks). Since most plant nurseries collect propagules from the  
92 surroundings, we presume that not only they represent the regional taxonomic diversity

93 but also the populations' genotypes (Zucchi et al. 2017; White et al. 2018). These results  
94 altogether reinforce the importance of the restoration supply chain, especially in those  
95 regions where restoration cannot rely on spontaneous regeneration processes and  
96 where a well-established native plant market may contribute to high diversity ecological  
97 restoration initiatives.

98           Despite the remarkable diversity of the restoration species pool we studied,  
99 the representation of regional floras was biased under several aspects. While both  
100 Atlantic Forest and Cerrado species were available in plant nurseries, there was an  
101 underrepresentation of savannas' specialists, which may lead to afforestation and to  
102 other negative consequences for the native diversity of the grassy biomes of Cerrado  
103 (Overbeck et al. 2013; Veldman et al. 2015a, 2015b; Abreu et al. 2017; Buisson et al.  
104 2018). Furthermore, the restoration species pool constituted a narrow spectrum of  
105 growth forms that lack or underrepresent lianas, epiphytes and herbs; in the Atlantic  
106 Forest and Cerrado biomes, these growth forms exceed 2 to 7 times the number of tree  
107 species (BFG 2015). Although production bias towards woody species exists because  
108 they are the main structural components of forests – the main target of Brazilian  
109 restoration initiatives - awareness should be raised as to the importance of other growth  
110 forms, especially for non-forest biomes, where restoration demand is increasing and  
111 propagation knowledge is still challenging (Overbeck et al. 2013; Campbell et al. 2015;  
112 Veldman et al. 2015a; Garcia et al. 2016; Mayfield 2016; Buisson et al. 2018). Considering  
113 only tree and shrub species, plant nurseries were offering customers less than 50% of  
114 species registered on studied references, reinforcing it is a huge challenge to offer  
115 species diversity for tropical diverse ecological restoration, even in the most established  
116 supply chain in Brazil (Silva et al. 2015, 2017). The situation is even more critical when

117 considering that only 2.3% (19 species) of São Paulo state's threatened plant species  
118 were found in plant nurseries, falling short of the objectives of the Global Strategy for  
119 Plant Conservation in Brazil, which defines a goal of making 20% of threatened species  
120 available for restoration efforts by 2020 (Martins et al. 2017). Since threatened species  
121 offer a greater challenge for conservationists, specific recovery plans would be  
122 necessary to achieve this particular goal (Durigan et al. 2010; Martins et al. 2017).

123           A positive aspect we highlight is that among the functional groups available  
124 in plant stocks, there were fast-growing shading tree species that boost soil coverage  
125 and shade exotic weeds (Rodrigues et al. 2009), as well as a great variety and quantity  
126 of canopy non-pioneer species, which will presumably persist in restored sites over time  
127 (Rodrigues et al. 2011; Brancalion et al. 2012a). However, the overall variety and  
128 quantities of animal-dispersed species are below those expected for tropical forests,  
129 which varies from 70 to 94% of woody species (Almeida-Neto et al. 2008; Bello et al.  
130 2017). As shown by Brancalion et al. (2018), large-seeded animal-dispersed species are  
131 particularly underrepresented in restoration projects, with consequences for carbon  
132 storage and restoration outcomes. We recommend enhancement on the proportion of  
133 animal-dispersed species in plant nurseries, since plants consumed and dispersed by  
134 animals are notably important in degraded landscapes, where maintenance of plant-  
135 animal interactions are essential to enable restoration of ecological processes, biological  
136 fluxes and ecosystem services (Howe 2016; Brancalion et al. 2018).

137           Tropical forests are typically characterized by skewed species-abundance  
138 distributions, with few common species and many rare or very rare (Caiafa & Martins  
139 2010; Hubbell 2013). As a possible reflection of this pattern, we found that almost 80%

140 of species were rare among plant nurseries, and half of total seedling production was  
141 composed by only 35 out of 561 native species (6%). These results are consonant with  
142 our findings on the high dissimilarity among plant stocks (i.e., high total  $\beta$  diversity),  
143 mainly due to the replacement of species among them (i.e., turnover) (Baselga 2010;  
144 Socolar et al. 2016). Previous studies have consistently indicated turnover as the larger  
145 component of total  $\beta$ -diversity in tropical ecosystems (Soininen et al. 2018), a pattern  
146 that was registered within the Atlantic Forest Domain in São Paulo state (Bergamin et  
147 al. 2017, Farah et al. 2017). Therefore, one possible explanation for the high  
148 dissimilarities among plant stocks may be related to plant nurseries' practice of  
149 collecting propagules from surrounding forest fragments, which are described as highly  
150 variable regarding species composition (Bergamin et al. 2017, Farah et al. 2017). In this  
151 sense, well-distributed nurseries not only maximize the chances of representing local  
152 specimens adapted for regional restoration projects (White et al. 2018) but may also  
153 enhance the taxonomic representation of regional floras. Thus, the biased geographic  
154 distribution of plant nurseries raises an issue to be addressed by public policy makers: a  
155 better regional planning must align restoration demand and seeds and seedlings  
156 production, and foster corrective and supportive measures such as the implementation  
157 of inter-regional seed exchange programs (Brancalion et al. 2012a; Jalonen et al. 2018).

158           Although plant stocks were assembled from surrounding fragments, we did  
159 not find evidence supporting the influence of the percentage of surrounding forest cover  
160 and number of vegetation types over the restoration species pool's diversity. That is  
161 probably because all nurseries evaluated on the detailed surveys were located in regions  
162 with reduced forest cover (less than 30%) and with little variation on vegetation types.  
163 Beyond the positive influence of production capacity over the diversity of the

164 restoration species pool, we consider that overall, high species richness most likely  
165 derived from the enforcement of São Paulo state legislation (Brançalion et al. 2010).  
166 Until 2014, the state legislation used to establish that restoration projects should reach  
167 a minimum of 80 native woody plant species (Aronson et al. 2011); currently, it has  
168 shifted the focus from the number of reintroduced species to the monitoring of  
169 structure and diversity goal achievement (Chaves et al. 2015). Regardless of the  
170 discussion on whether it is positive or negative to standardize the amount of species on  
171 a restoration project (Aronson et al. 2011), we must recognize that these legal  
172 instruments have pushed plant nurseries to enhance their diversity (Brançalion et al.  
173 2012a; Silva et al. 2017), placing São Paulo state native trees' seedling production at a  
174 very high level, far higher than elsewhere in Brazil, and possibly worldwide.

175           Despite the positive aspects we detected on the diversity of the restoration  
176 species pool, we must consider some caveats. First, we highlight the worrisome market  
177 downturn that have been affecting the production of native seedlings since the initial  
178 discussions to revise the main environmental legislation in Brazil (i.e., Native Vegetation  
179 Protection Law no. 12.651/2012) (details in Brançalion et al. 2016a). Second, we  
180 considered only the rainy season of 2015/2016 and species richness may be even higher  
181 if a longer period is evaluated, as flowering and fruiting periods have interannual  
182 variability (Morellato et al. 2001; Viani & Rodrigues 2009; Brançalion et al. 2012a). Third,  
183 few nurseries adopt good identification practices such as the collection of voucher  
184 specimens for depositing in herbaria and examination by professional botanists.  
185 Mistaken identification in plant nurseries can mislead to over- or under-estimations of  
186 the actual diversity available on nurseries and it may also explains the production of

187 non-native species, a common issue in restoration sites (Barbosa et al. 2003; Assis et al.  
188 2013; Brancalion et al. 2016b).

189           Our results underscore that the restoration species pool in São Paulo  
190 comprehends a considerable portion of tree and shrub diversity, but how it affects  
191 success of ecological restoration depends on whether we consider biodiversity  
192 introduced in restoration projects as a goal or a driver of the recovery process (Naeem  
193 2016). There is an ongoing debate in Brazil regarding the benefits of using high or low  
194 diversity in restoration efforts (Brancalion et al. 2010; Durigan et al. 2010; Aronson et al.  
195 2011). It considers arguments related to cost reductions, field performance and the  
196 definition of presumed “framework species” (Suganuma & Durigan 2015), as well as  
197 compelling evidence associating biodiversity and ecosystem functioning (BEF) (Aerts &  
198 Honnay 2011; Cardinale et al. 2012; Tilman et al. 2014; Brockerhoff et al. 2017). Despite  
199 the lack of consistent evidence relating the amount of reintroduced diversity and  
200 restoration success, pursuing and promoting higher diversity in the restoration species  
201 pool is essential to broaden and foster a wide variety of restoration approaches. A large  
202 restoration species pool could benefit other conservation purposes such as the  
203 restoration of degraded forest remnants (Viani et al. 2015), and enable some economic  
204 trade-off for landowners who comply with the law, through the sustainable exploitation  
205 of timber and non-timber products from native species (Brancalion et al 2012b and  
206 2016a; Amazonas et al. 2018; Cerullo & Edwards 2018).

207           The impressive levels of species richness registered in this study represent,  
208 to our knowledge, the most diverse tropical native tree seedling production and supply  
209 chain anywhere in the world. Particularly on human-modified landscapes with reduced

210 forest cover, plant nurseries play a pivotal role propagating the remaining biodiversity,  
211 as they collect most of their seed from local provenances and represent local  
212 populations and communities (Jalonen et al. 2018). However, even a well-established  
213 supply chain offered a restrained restoration species pool, limited by deficient  
214 knowledge on species' biology, uneven plant nurseries' geographic distribution, and lack  
215 of technical capacitation and assistance. These limitations expose issues and  
216 opportunities to be addressed by restoration policies aiming to optimize the full  
217 potential of restoration plantings, especially supporting the conservation value of forest  
218 fragments in human-modified landscapes.

219

220 **ACKNOWLEDGEMENTS:** We thank all plant nurseries' owners and staff for sharing  
221 their information and thoughts; Letícia S. Santos, Bruno H. Guastala, Fernando H. Silva  
222 and Sergio Lozano-Baez for contacting nurseries during quick surveys. We warmly  
223 thank James Aronson for comments and suggestions that helped to improve this  
224 manuscript. This study was financed in part by the Coordenação de Aperfeiçoamento  
225 de Pessoal de Nível Superior – Brasil (CAPES) – Finance Code 001, by the National  
226 Council for Scientific and Technological Development (CNPq grant #870360/1997-3)  
227 and by The São Paulo Research Foundation (FAPESP grant # 2013/50718-5).

228 **LITERATURE CITED**

- 229 Abreu RCR, Hoffmann WA, Vasconcelos HL, Pilon NA, Rossatto DR, Durigan G (2017)  
230 The biodiversity cost of carbon sequestration in tropical savanna. *Science Advances*  
231 3:e1701284
- 232 Aerts R, Honnay O (2011) Forest restoration, biodiversity and ecosystem functioning.  
233 *BMC Ecology* 24:11-29
- 234 Aronson J, Brancalion PHS, Durigan G, Rodrigues RR, Engel VL, Tabarelli M, et al. (2011)  
235 What Role Should Government Regulation Play in Ecological Restoration? Ongoing  
236 Debate in São Paulo State, Brazil. *Restoration Ecology* 19:690–695  
237
- 238 Assis GB, Suganuma MS, Melo ACG, Durigan G (2013) Uso de espécies nativas e  
239 exóticas na restauração de matas ciliares no Estado de São Paulo (1957 - 2008). *Revista*  
240 *Árvore* 37:599–609
- 241 Banks-Leite C, Pardini R, Tambosi L, Pearse WD, Bueno AA, Bruscatin RT et al. (2014)  
242 Using ecological thresholds to evaluate the costs and benefits of set-asides in a  
243 biodiversity hotspot. *Science* 345:1041–1045
- 244 Barbosa LM, Barbosa JM, Barbosa KC, Potomati A, Martins SE, Asperti LM et al. (2003)  
245 Recuperação Florestal Com Espécies Nativas No Estado De São Paulo: Pesquisas  
246 Apontam Mudanças Necessárias. *Florestar estatístico* 6:28–34
- 247 Barbosa LM and Martins SE (2003) Diversificando o reflorestamento no estado de São  
248 Paulo: espécies disponíveis por região e ecossistema. Secretaria de Meio Ambiente do  
249 Estado de São Paulo, São Paulo
- 250 Baselga A (2010) Partitioning the turnover and nestedness components of beta  
251 diversity. *Global Ecology and Biogeography* 19:134–143
- 252 Baselga A, Orme CDL (2012) Betapart: An R package for the study of beta diversity.  
253 *Methods in Ecology and Evolution* 3:808–812
- 254 Bello C, Galetti M, Montan D, Pizo MA, Mariguela TC, Culot L, et al. (2017) Atlantic  
255 frugivory : A plant – frugivore interaction data set for the Atlantic Forest. *Ecology* 0:0
- 256 Bello C, Galetti M, Pizo MA, Magnago LFS, Rocha MF, Lima RAF, Peres CA, Ovaskainen  
257 O, Jordano P (2015) Defaunation affects carbon storage in tropical forests. *Science*  
258 *Advances* 1:1–11
- 259 Bergamin RS, Bastazini VAG, Vélez-Martin E, Debastiani V, Zanini KJ, Loyola R, Müller  
260 SC (2017) Linking beta diversity patterns to protected areas: lessons from the Brazilian  
261 Atlantic Rainforest. *Biodiversity and Conservation*
- 262 BFG The Brazil Flora Group (2015) Growing knowledge: an overview of Seed Plant  
263 diversity in Brazil. *Rodriguesia* 66:1-29



- 264 Bolker BM (2008) Ecological models and data in R. Princeton University Press, New  
265 Jersey
- 266 Brancalion PHS, Bello C, Chazdon RL, Galetti M, Jordano P, Lima RAF, et al. (2018)  
267 Maximizing biodiversity conservation and carbon stocking in restored tropical forests.  
268 Conservation Letters:e12454
- 269 Brancalion PHS, Garcia LC, Loyola R, Rodrigues RR, Pillar VD, Lewinsohn TM (2016a) A  
270 critical analysis of the Native Vegetation Protection Law of Brazil (2012): Updates and  
271 ongoing initiatives. *Natureza e Conservacao* 14:1–15
- 272 Brancalion PHS, Melo FPL, Tabarelli M, Ricardo R (2013) Biodiversity persistence in  
273 highly human-modified tropical landscapes depends on ecological restoration. *Tropical*  
274 *Conservation Science* 6:705–710
- 275 Brancalion PHS, Rodrigues RR, Gandolfi S, Kageyama PY, Nave AG, Gandara FB, Barbosa  
276 LM, Tabarelli M (2010) Instrumentos legais podem contribuir para a restauração de  
277 florestas tropicais biodiversas. *Revista Árvore* 34:455–470
- 278 Brancalion PHS, Schweizer D, Gaudare U, Mangueira JR, Lamonato F, Farah FT, Nave  
279 AG, Rodrigues R (2016b) Balancing economic costs and ecological outcomes of passive  
280 and active restoration in agricultural landscapes : the case of Brazil. *Biotropica* 48:856–  
281 867.
- 282 Brancalion PHS, Viani RAG, Aronson J, Rodrigues RR, Nave AG (2012a) Improving  
283 Planting Stocks for the Brazilian Atlantic Forest Restoration through Community-Based  
284 Seed Harvesting Strategies. *Restoration Ecology* 20:704–711
- 285 Brancalion PHS, Viani RAG, Strassburg BBN, Rodrigues RR (2012b) Finding the money  
286 for tropical forest restoration. *Unasylva* 63:41–50
- 287 Brockerhoff EG, Barbaro L, Castagneyrol B, Forrester DI, Gardiner B, Lyver POB et al.  
288 (2017) Forest biodiversity , ecosystem functioning and the provision of ecosystem  
289 services. *Biodiversity and Conservation* 26:3005
- 290 Buisson E, Le Stradic S, Silveira FAO, Durigan G, Overbeck GE, Fidelis A et al. (2018)  
291 Resilience and restoration of tropical and subtropical grasslands, savannas, and grassy  
292 woodlands. *Biological Reviews*
- 293 Caiafa AN and Martins FR (2010) Forms of rarity of tree species in the southern  
294 Brazilian Atlantic rainforest. *Biodiversity and Conservation* 19:2597–2618
- 295 Calmon M, Brancalion PHS, Paese A, Aronson J, Castro P, Silva SC, Rodrigues RR (2011)  
296 Emerging Threats and Opportunities for Large-Scale Ecological Restoration in the  
297 Atlantic Forest of Brazil. *Restoration Ecology* 19:154–158
- 298 Cardinale BJ, Duffy E, Gonzalez A, Hooper DU, Perrings C, Venail P, et al. (2012)  
299 Biodiversity loss and its impact on humanity. *Nature* 489:326–326

- 300 Carvalho GH, Cianciaruso MV, Batalha MA (2010) Plantminer: A web tool for checking  
301 and gathering plant species taxonomic information. *Environmental Modelling and*  
302 *Software* 25:815–816
- 303 Cerullo GR & Edwards DP (2018) Actively restoring resilience in selectively logged  
304 tropical forests. *Journal of Applied Ecology*, 56, 1:107-118
- 305 Chaves RB, Durigan G, Brancalion PHS, Aronson J (2015) On the need of legal  
306 frameworks for assessing restoration projects success: new perspectives from São  
307 Paulo state (Brazil). *Restoration Ecology* 23:754–759
- 308 Chazdon RL and Uriarte M (2016) Incorporating natural regeneration in forest  
309 landscape restoration in tropical regions : synthesis and key research gaps. *Biotropica*  
310 48:915–924
- 311 Crouzeilles R, Curran M, Ferreira MS, Lindenmayer DB, Grelle CE V, Rey Benayas JM  
312 (2016) A global meta-analysis on the ecological drivers of forest restoration success.  
313 *Nature communications* 7:1–8
- 314 Crouzeilles R, Ferreira MS, Chazdon RL, Lindenmayer DB, Sansevero JBB, Monteiro L, et  
315 al. (2017) Ecological restoration success is higher for natural regeneration than for  
316 active restoration in tropical forests. *Science Advances* 3:e1701345
- 317 Dedefo K, Derero A, Tesfaye Y, Muriuki J (2017) Tree nursery and seed procurement  
318 characteristics influence on seedling quality in Oromia, Ethiopia. *Forests Trees and*  
319 *Livelihoods* 26:96–110
- 320 Durigan G (2012) Estrutura e diversidade de comunidades florestais. Pages 294–319  
321 In: Martins SV (editor) *Ecologia de florestas tropicais do Brasil*. Universidade Federal de  
322 Viçosa, Viçosa, Minas Gerais
- 323 Durigan G, Engel VL, Torezan JM, Melo ACG, Marques MCM, Martins SV, et al. (2010)  
324 Normas jurídicas para a restauração ecológica: uma barreira a mais a dificultar o êxito  
325 das iniciativas? *Revista Árvore* 34:471–485
- 326 Estavillo C, Pardini R, Rocha PLB (2013) Forest loss and the biodiversity threshold: An  
327 evaluation considering species habitat requirements and the use of matrix habitats.  
328 *PLoS ONE* 8:1–10
- 329 Farah FT, Muylaert RL, Ribeiro MC, Ribeiro JW, Mangueira JRSA, Souza VC, Rodrigues  
330 RR (2017) Integrating plant richness in forest patches can rescue overall biodiversity in  
331 human-modified landscapes. *Forest Ecology and Management* 397:78–88
- 332 Flora do Brasil 2020 Jardim Botânico do Rio de Janeiro. Available on  
333 <http://floradobrasil.jbrj.gov.br/> (accessed 20 July 2018)
- 334 Forzza RC, Baumgratz JF, Bicudo CEM, Canhos DAL, Carvalho Jr AA, Coelho MAN et al.  
335 (2012) New Brazilian Floristic List Highlights Conservation Challenges. *BioScience*  
336 62:39–45

- 337 Garcia LC, Hobbs RJ, Ribeiro DB, Tamashiro JY, Santos FAM, Rodrigues RR (2016)  
338 Restoration over time: is it possible to restore trees and non-trees in high-diversity  
339 forests? *Applied Vegetation Science* 19, 655-666
- 340 Gregorio N, Herbohn J, Harrison S (2004) Small-scale forestry development in Leyte,  
341 Philippines: The central role of nurseries. *Small-scale Forest Economics, Management*  
342 *and Policy* 3:337–351
- 343 Hilborn R and Mangel M (1997) *The Ecological Detective Confronting Models with*  
344 *Data*. Princeton University Press, New Jersey
- 345 Holl KD (2017) Restoring tropical forests from the bottom up. *Science* 355:455–456
- 346 Holl KD and Aide TM (2011) When and where to actively restore ecosystems? *Forest*  
347 *Ecology and Management* 261:1558–1563
- 348 Holl KD, Reid JL, Chaves-Fallas JM, Oviedo-Brenes F, Zahawi RA (2017) Local tropical  
349 forest restoration strategies affect tree recruitment more strongly than does landscape  
350 forest cover. *Journal of Applied Ecology* 54:1091–1099
- 351 Hubbell SP (2013) Tropical rain forest conservation and the twin challenges of diversity  
352 and rarity. *Ecology and Evolution* 3:3263–3274
- 353 Jalonen R, Valette M, Boshier D, Duminil J, Thomas E (2018) Forest and landscape  
354 restoration severely constrained by a lack of attention to the quantity and quality of  
355 tree seed: Insights from a global survey. *Conservation Letters*
- 356 Ladouceur E, Jim B, Marin M, Vitis M De, Abbandonato H, Iannetta PPM, Bonomi C,  
357 Pritchard HW (2017) Native Seed Supply and the Restoration Species Pool.  
358 *Conservation Letters* 11(2): e12381. <https://doi.org/10.1111/conl.12381>
- 359 Latawiec AE, Crouzeilles R, Brancalion PHS, Rodrigues RR, Sansevero JB, Santos JS, et al.  
360 (2016) Natural regeneration and biodiversity: a global meta-analysis and implications  
361 for spatial planning. *Biotropica* 48:844–855
- 362 Lorenzi H (2002) *Árvores Brasileiras: manual de identificação e cultivo de plantas*  
363 *arbóreas do Brasil*. Instituto Plantarum, Nova Odessa, São Paulo
- 364 Magurran AE (2013) *Measuring biological diversity*. Blackwell Publishing Company
- 365 Martins E, Loyola R, Martinelli G (2017) Challenges and Perspectives for Achieving the  
366 Global Strategy for Plant Conservation Targets in Brazil. *Annals of the Missouri*  
367 *Botanical Garden* 102:347–356
- 368 Martins RB (2011) *Diagnóstico dos produtores de mudas florestais nativas do Estado*  
369 *de São Paulo*. Secretaria de Meio Ambiente do Estado de São Paulo, São Paulo
- 370 McGill BJ, Etienne RA, Gray JS, Alonso D, Anderson MJ, Benecha HK, et al. (2007)  
371 Species abundance distributions: Moving beyond single prediction theories to  
372 integration within an ecological framework. *Ecology Letters* 10:995–1015

- 373 Meli P, Holl KD, Benayas JMR, Jones HP, Jones PC, Montoya D, Mateos DM (2017) A  
374 global review of past land use, climate, and active vs. passive restoration effects on  
375 forest recovery. *PLoS ONE* 12:1–17
- 376 Melo FPL, Pinto SRR, Brancalion PHS, Castro PS, Rodrigues RR, Aronson J, Tabarelli M  
377 (2013) Priority setting for scaling-up tropical forest restoration projects: Early lessons  
378 from the Atlantic forest restoration pact. *Environmental Science and Policy* 33:395–  
379 404
- 380 Mendonça RC, Felfili JM, Walter BM, Silva Junior MC, Rezende AV, Filgueiras TS,  
381 Nogueira P (2008) Flora vascular do bioma Cerrado. Pages 422–442 In Sano SM,  
382 Almeida SP, Ribeiro JF (eds.) *Flora vascular do bioma Cerrado: checklist com 12.356*  
383 *espécies*. EMBRAPA Cerrados, Brasília, Distrito Federal
- 384 Morellato LPC, Talora DC, Takahasi A, Bencke CC, Romera EC, Zipparro VB (2001)  
385 Phenology of Atlantic rain forest trees: A comparative study. *Biotropica* 32:811–823
- 386 Myers N, Mittermeier RA, Mittermeier CG, Fonseca GA, Kent J (2000) Biodiversity  
387 hotspots for conservation priorities. *Nature* 403:853–858
- 388 Naeem S (2016) Biodiversity as a Goal and Driver of Restoration. Pages 57–89 In  
389 Palmer, MA, Zedler JB, Falk DA (eds.) *Foundations of Restoration Ecology*. Second  
390 edition. Island Press, Washington
- 391 Nevill PG, Tomlinson S, Elliott CP, Espeland EK, Dixon KW, Merritt DJ (2016) Seed  
392 production areas for the global restoration challenge. *Ecology and Evolution* 6:7490–  
393 7497
- 394 Oliveira RE and Zakia MJB (2010) Guia para análise de viveiros de mudas nativas -  
395 Checklist para verificação da adequação legal, socioambiental e ecológica de viveiros  
396 de mudas florestais nativas. Piracicaba, São Paulo
- 397 Overbeck GE, Hermann JM, Andrae BO, Boldrini II, Kiehl K, Kirmer A, et al. (2013)  
398 Restoration ecology in Brazil-time to step out of the forest. *Natureza e Conservação*  
399 11:92–95
- 400 Palma AC and Laurance SGW (2015) A review of the use of direct seeding and seedling  
401 plantings in restoration: What do we know and where should we go? *Applied*  
402 *Vegetation Science* 18:561–568
- 403 Pardini R, Bueno ADA, Gardner TA, Prado PI, Metzger JP (2010) Beyond the  
404 fragmentation threshold hypothesis: regime shifts in biodiversity across fragmented  
405 landscapes. *PloS one* 5:e13666
- 406 Prado PI, Miranda MD, Chalom A (2016) sads: Maximum Likelihood Models for Species  
407 Abundance Distributions R package version 0.3.1. Available from [https://cran.r-](https://cran.r-project.org/package=sads)  
408 [project.org/package=sads](https://cran.r-project.org/package=sads)

- 409 Rodrigues RR, Gandolfi S, Nave AG, Aronson J, Barreto TE, Vidal CY, Brancalion PHS  
410 (2011) Large-scale ecological restoration of high-diversity tropical forests in SE Brazil.  
411 *Forest Ecology and Management* 261: 1605-1613
- 412 Rodrigues RR, Lima RAF, Gandolfi S, Nave AG (2009) On the restoration of high  
413 diversity forests: 30 years of experience in the Brazilian Atlantic Forest. *Biological*  
414 *Conservation* 142:1242–1251
- 415 Sæther BE, Engen S, Grøtan V (2013) Species diversity and community similarity in  
416 fluctuating environments: Parametric approaches using species abundance  
417 distributions. *Journal of Animal Ecology* 82:721–738
- 418 Sartorelli PAR, Benedito ALD, Campos Filho EM, Sampaio AB, Ana S, Gouvêa APM  
419 (2018) Guia de plantas não desejáveis na restauração florestal. Agroicone, São Paulo.  
420 Available from [http://www.inputbrasil.org/wp-content/uploads/2018/03/guia-plantas-](http://www.inputbrasil.org/wp-content/uploads/2018/03/guia-plantas-nao-desejaveis.pdf)  
421 [nao-desejaveis.pdf](http://www.inputbrasil.org/wp-content/uploads/2018/03/guia-plantas-nao-desejaveis.pdf)
- 422 SER Society for Ecological Restoration International Science & Policy Working Group  
423 (2004) *The SER International Primer on Ecological Restoration*. Tucson, Arizona.
- 424 Silva APM, Marques HR, Santos TVMN, Teixeira AMC, Luciano MSF, Sambuichi RHR  
425 (2015) *Diagnóstico da Produção de Mudanças Florestais Nativas no Brasil*. IPEA, Brasília,  
426 Distrito Federal
- 427 Silva APM, Schweizer D, Marques HR, Cordeiro AM, Nascente TVM, Sambuichi RHR, et  
428 al. (2017) Can current native tree seedling production and infrastructure meet an  
429 increasing forest restoration demand in Brazil? *Restoration Ecology* 25:509–515
- 430 Slik JWF et al. (2015) An estimate of the number of tropical tree species. *Proceedings*  
431 *of the National Academy of Sciences* 112:7472-7477
- 432 Soares-Filho B, Rajão R, Macedo M, Carneiro A, Costa W, Coe M, et al. (2014) Cracking  
433 Brazil's Forest Code. *Science* 344:363–364
- 434 Socolar JB, Gilroy JJ, Kunin WE, Edwards DP (2016) How Should Beta-Diversity Inform  
435 Biodiversity Conservation? *Trends in Ecology and Evolution* 31:67–80
- 436 Soininen J, Heino J, Wang J (2018) A meta-analysis of nestedness and turnover  
437 components of beta diversity across organisms and ecosystems. *Global Ecology and*  
438 *Biogeography* 27:96–109
- 439 Suganuma MS and Durigan G (2015) Indicators of restoration success in riparian  
440 tropical forests using multiple reference ecosystems. *Restoration Ecology* 23:238–251
- 441 Tambosi LR, Martensen AC, Ribeiro MC, Metzger JP (2013) A framework to optimize  
442 biodiversity restoration efforts based on habitat amount and landscape connectivity.  
443 *Restoration Ecology* 22:169–177
- 444 R Development Core Team (2011) *R: a language and environment for statistical*  
445 *computing*. R Foundation for Statistical Computing, Vienna, Austria

- 446 Tilman D, Isbell F, Cowles JM (2014) Biodiversity and ecosystem functioning. Annual  
447 Review of Ecology, Evolution, and Systematics 45:471–493
- 448 Veldman JW, Overbeck GE, Negreiros D, Mahy G, Le Stradic S, Fernandes GW, et al.  
449 (2015a) Tyranny of trees in grassy biomes. Science 347:484–485
- 450 Veldman JW, Overbeck GE, Negreiros D, Mahy G, Stradic SLE, Fernandes GW, et al.  
451 (2015b) Where Tree Planting and Forest Expansion are Bad for Biodiversity and  
452 Ecosystem Services. BioScience 65:1011–1018
- 453 Viani RAG, Holl KD, Padovezi A, Strassburg BBN, Farah FT, Chaves RB, et al. (2017)  
454 Protocol for Monitoring Tropical Forest Restoration: Perspectives From the Atlantic  
455 Forest Restoration Pact in Brazil. Tropical Conservation Science 10:1–8
- 456 Viani RAG, Mello FNA, Chi IE, Brancalion PHS (2015) A new focus for ecological  
457 restoration: Management of degraded forest remnants in fragmented landscapes. GPL  
458 news November:5–9
- 459 Viani RAG and Rodrigues RR (2009) Potential of the seedling community of a forest  
460 fragment for tropical forest restoration. Scientia Agricola 66:772–779
- 461 White A, Fant J, Havens K, Skinner M, Krammer A (2018) Restoring species diversity:  
462 assessing capacity in the United States native plant industry. Restoration Ecology 26:  
463 605–611
- 464 Zucchi MI, Suiji PS, Mori GM, Viana JPG, Grando C, Silvestre EA, et al. (2017) Genetic  
465 diversity of reintroduced tree populations in restoration plantations of the Brazilian  
466 Atlantic Forest. Restoration Ecology 26:694–701
- 467
